# Supplementary material for: Organoid-derived intestinal epithelial cells are a suitable model for preclinical toxicology and pharmacokinetic studies
Source: PubMed Central journal article supplement — iScience. 2022 Jun 7;25(7):104542. doi: 10.1016/j.isci.2022.104542 (PMC9218437; doi:10.1016/j.isci.2022.104542), 2022-06-07
Supplement: mmc1.pdf [file mmc1.pdf]

**iScience, Volume 25**

**Supplemental information**

**Organoid-derived intestinal epithelial  
cells are a suitable model for preclinical  
toxicology and pharmacokinetic studies**

**Yu Takahashi, Makoto Noguchi, Yu Inoue, Shintaro Sato, Makoto Shimizu, Hirotatsu Kojima, Takayoshi Okabe, Hiroshi Kiyono, Yoshio Yamauchi, and Ryuichiro Sato**

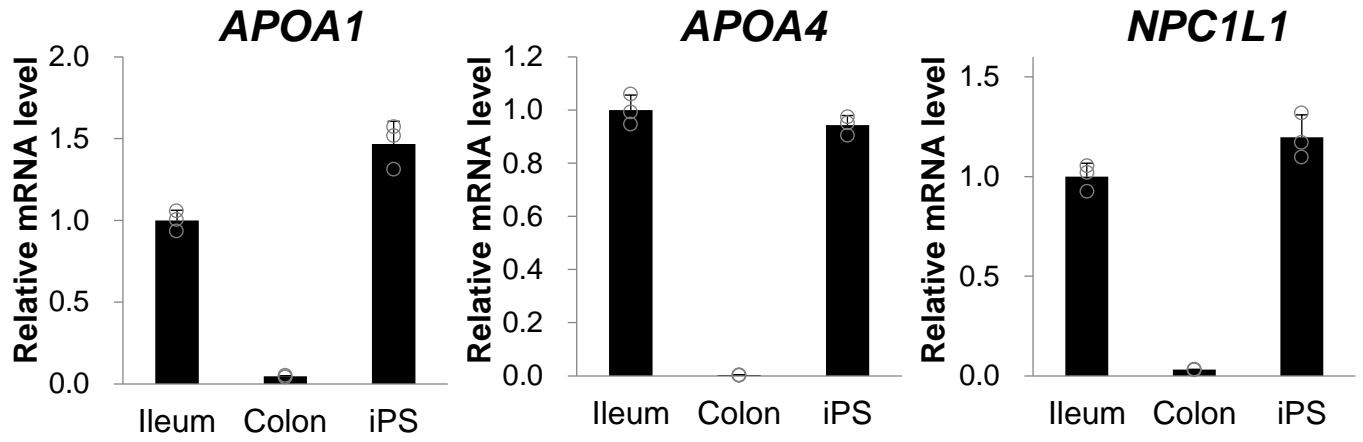

**Figure S1. Comparison of small intestinal genes among different types of organoids, Related to Figure 1.** Human organoids developed from primary ileum, transverse colon, and iPS cells were cultured in human organoid culture medium for 6 days after passage. After cells were harvested, *APOA1*, *APOA4*, and *NPC1L1* mRNA levels were determined by qRT-PCR and normalized to 18S rRNA levels. Assays were performed in  $n = 3$  independent biological replicates (mean  $\pm$  S.D.).

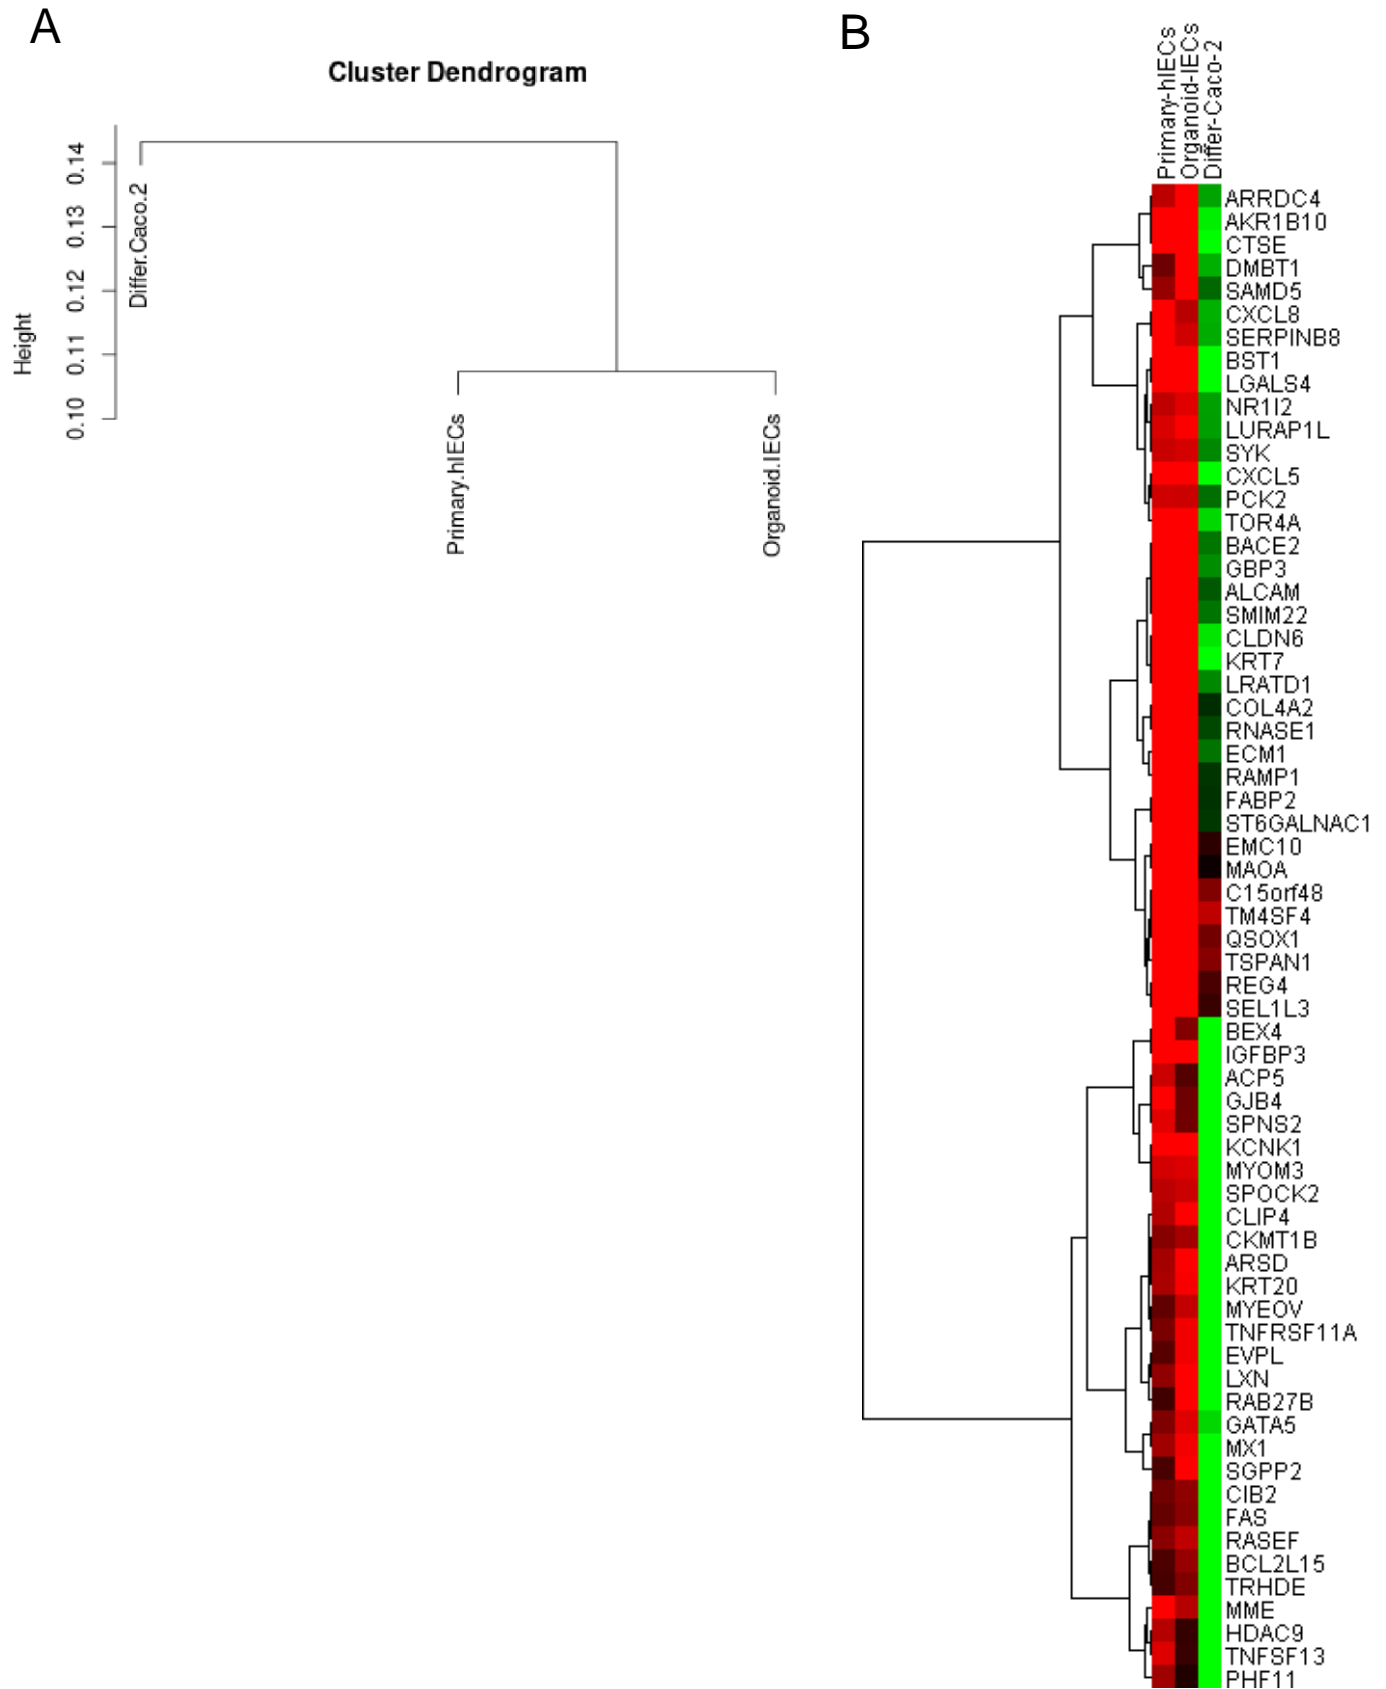

**Figure S2. Analysis of RNA sequence data among different types of IECs, Related to Figure 1.** RNA was extracted and purified from primary human IECs (Primary hIECs), hiPSO-derived monolayer IECs (Organoid-IECs), and differentiated Caco-2 cells (Differ-Caco-2). (A) A dendrogram was drawn with distances determined by Hierarchical clustering analysis with Spearman correlation of the complete RNA sequence transcriptome data. (B) A heat map of genes with normalized TPM values >1 of Organoid-IECs and more than 20-fold normalized TPM values of Organoid-IECs than those of Differ-Caco-2.

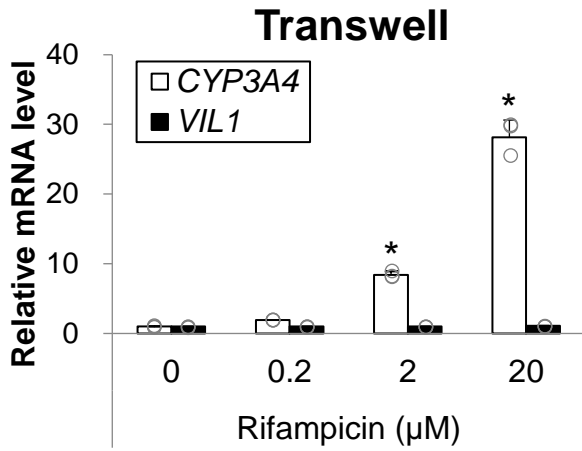

**Figure S3. CYP3A4 induction by rifampicin in monolayer organoid-derived IECs cultured in Transwells, Related to Figure 2.** hiPSO-derived monolayer IECs in collagen I-coated Transwells were treated with 0, 0.2, 2, 20 µM rifampicin for 48 h. After cells were harvested, *CYP3A4* and *VIL1* mRNA levels were determined by qRT-PCR and normalized to 18S rRNA levels. Assays were performed in  $n = 3$  independent biological replicates (mean  $\pm$  S.D.). Statistical significance was determined by one-way analysis of variance with the Bonferroni test. \* $P < 0.05$  (versus no rifampicin).

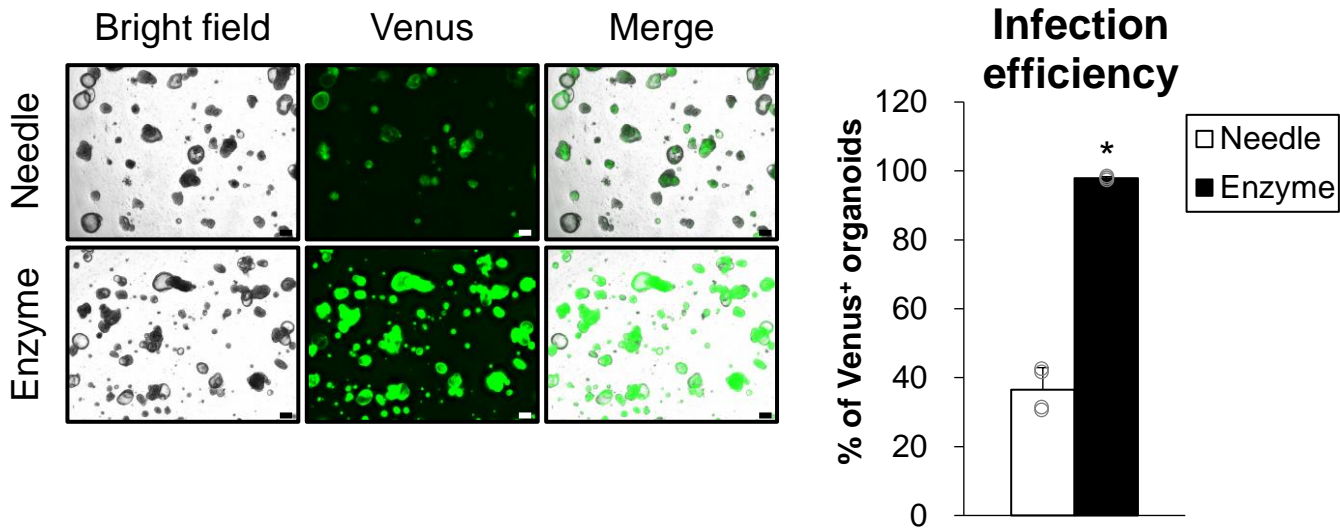

**Figure S4. Improved lentiviral infection efficiency into human intestinal organoids, Related to Figure 3.** After being disrupted by physical breaking with a 26-gauge needle or dispersed by enzymatic digestion with TrypLE Express solution followed by vigorous pipetting, hiPSOs were seeded on collagen I-coated plates. Cells were cultured for four days (physical breaking, “Needle”) or one day (enzymatic digestion, “Enzyme”), infected with 4-fold diluted internal ribosome entry site-Venus lentiviruses, and embedded in Matrigel to regenerate organoids. (Left) bright-field or fluorescent images of organoids after 9 days of infection were taken. Scale bar, 200  $\mu$ m. (Right) The proportions of Venus-positive organoids per microscopic bright field after 9 days of infection were calculated. Assays were performed in  $n = 4$  independent images (mean  $\pm$  S.D.). Statistical significance was determined by Student’s t-test. \* $P < 0.05$  (versus Needle).

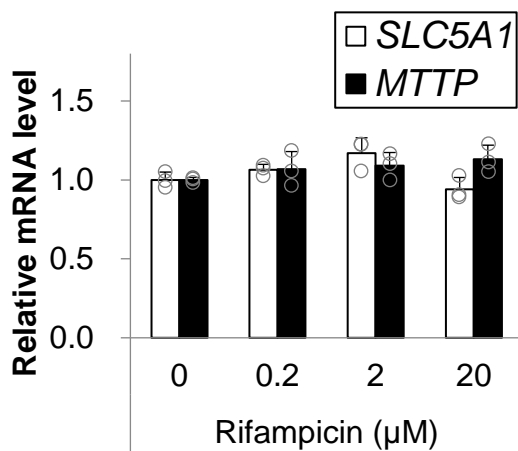

**Figure S5. No change in *SLC5A1* and *MTTP* gene expression upon treatment with rifampicin in monolayer organoid-derived IECs, Related to Figure 4.** hiPSO-derived monolayer IECs cultured in collagen I-coated 12-well plates were treated with 0, 0.2, 2, 20 µM rifampicin for 48 h. After cells were harvested, *SLC5A1* and *MTTP* mRNA levels were determined by qRT-PCR and normalized to 18S rRNA levels. Assays were performed in  $n = 3$  independent biological replicates (mean  $\pm$  S.D.).

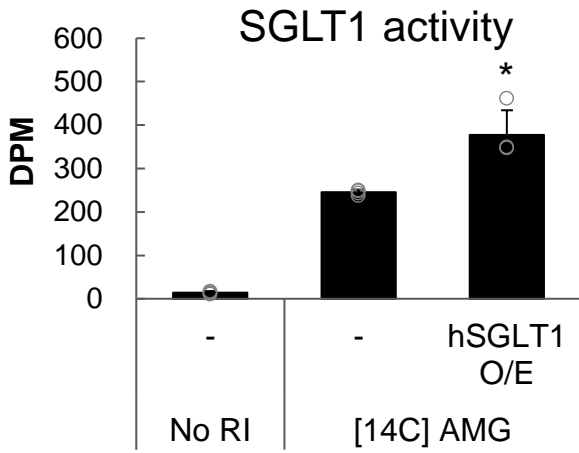

**Figure S6. An increase in SGLT1 activity of Caco-2 cells exogenously overexpressing human SGLT1, Related to Figure 4.** Caco-2 cells were transiently transfected with either empty (mock) or human SGLT1 expression plasmid using Lipofectamine 3000 reagent. After 72 h, cells were treated with 100  $\mu$ M AMG and 1  $\mu$ M [14C]-AMG for 1 h and lysed. A scintillation counter determined radioactivity. Assays were performed in  $n = 4$  independent biological replicates (mean  $\pm$  S.D.). Statistical significance was determined by Student's t-test. \* $P < 0.05$  (versus mock).

**Table S1. IC<sub>50</sub> values and Hill coefficients of 4-HPR in hiPSO-derived IECs in the presence or absence of 20 μM rifampicin, Related to Figure 6.**

|                             | <b>IC<sub>50</sub> (μM)</b>      |                           | <b>Hill coefficient</b>          |                           |
|-----------------------------|----------------------------------|---------------------------|----------------------------------|---------------------------|
|                             | <b>(95% confidence interval)</b> |                           | <b>(95% confidence interval)</b> |                           |
|                             | <b>–Rifampicin</b>               | <b>+Rifampicin</b>        | <b>–Rifampicin</b>               | <b>+Rifampicin</b>        |
| <b>–Pretreatment</b>        | <b>0.98</b><br>(0.89 - 1.1)      | <b>2.9</b><br>(2.2 - 3.7) | <b>1.2</b><br>(1.1 - 1.3)        | <b>1.5</b><br>(1.0 - 2.9) |
| <b>+Pretreatment (24 h)</b> | <b>0.87</b><br>(0.83 - 0.90)     | <b>4.8</b><br>(4.6 - 4.9) | <b>1.9</b><br>(1.8 - 2.0)        | <b>4.9</b><br>(4.0 - 8.0) |



**Table S2. A list of qPCR probes and primers used in this study, Related to STAR Methods.**

| Probe         |                             |                      |
|---------------|-----------------------------|----------------------|
| Gene          | Supplier                    | ID                   |
| <i>CDH17</i>  | Integrated DNA Technologies | Hs.PT.58.38621861    |
| <i>CDX2</i>   | Integrated DNA Technologies | Hs.PT.58.20039761    |
| <i>CHGA</i>   | Integrated DNA Technologies | Hs.PT.58.26803667    |
| <i>CYP3A4</i> | Integrated DNA Technologies | Hs.PT.58.1272782     |
| <i>DGAT1</i>  | Thermo Fisher Scientific    | Hs00201385_m1        |
| <i>LYZ</i>    | Integrated DNA Technologies | Hs.PT.58.24761205    |
| <i>MTTP</i>   | Integrated DNA Technologies | Hs.PT.58.94887       |
| <i>NPC1L1</i> | Integrated DNA Technologies | Hs.PT.58.2402286     |
| <i>NR1I3</i>  | Integrated DNA Technologies | Hs.PT.58.1610919     |
| <i>NR1I2</i>  | Integrated DNA Technologies | Hs.PT.58.417352      |
| <i>PPARA</i>  | Integrated DNA Technologies | Hs.PT.58.45310483    |
| <i>VIL1</i>   | Integrated DNA Technologies | Hs.PT.58.4630053     |
| 18S           | Integrated DNA Technologies | Hs.PT.39a.22214856.g |

| Primer        |                                 |                                |
|---------------|---------------------------------|--------------------------------|
| Gene          | Forward                         | Reverse                        |
| <i>APOA1</i>  | 5'-AGAGACTATGTGTCCCAGTTTGAAG-3' | 5'-CAGTTGTCAAGGAGCTTTAGGTTT-3' |
| <i>APOA4</i>  | 5'-CGTGGAACATCTCCAGAAATCT-3'    | 5'-CTTCCCAATCTCCTCCTTCAGT-3'   |
| <i>APOE</i>   | 5'-TGCGTTGCTGGTCACATTC-3'       | 5'-TCTGTCTCCACCGCTTGCT-3'      |
| <i>MUC2</i>   | 5'-ACTCTCCACACCCAGCATCATC-3'    | 5'-GTGTCTCCGTATGTGCCGTTGT-3'   |
| <i>SLC5A1</i> | 5'-CTACACCATGACCACCAAGTTC-3'    | 5'-CGGGCCTTTTAAGCAGTATCAA-3'   |
